# Supplementary material
Source: Springer Nature journal article supplement (https://www.springermedizin.de/resource/supplementary/12961_2010_165_MOESM1_ESM.pdf/9571704)
Supplement: MOESM1 [file 9571704]

**Evidence Based Acute and Chronic  
CVD Management**

**Clinic based risk factors control.  
Smoking cessation, BP control  
Lipid and Diabetes management**

**Improving medical education**

**Healthcare Financing  
Policies for smoking, diet and physical  
activity modulation**

**Tackling Social Determinants of Health**
